# Supplementary material for: SPACe: an open-source, single-cell analysis of Cell Painting data
Source: PubMed Central journal article supplement — Nat Commun. 2024 Nov 23;15:10170. doi: 10.1038/s41467-024-54264-4 (PMC11585637; doi:10.1038/s41467-024-54264-4), 2024-11-23
Supplement: 41467_2024_54264_MOESM1_ESM.pdf [file 41467_2024_54264_MOESM1_ESM.pdf]

**SUPPLEMENTARY INFORMATION**

**Table S1. Description of SPACe extracted features**

|                   | <b>Feature name</b>      | <b>Channel</b>                                                    | <b>Description</b>                                                                                                                                                                                                                                                        |
|-------------------|--------------------------|-------------------------------------------------------------------|---------------------------------------------------------------------------------------------------------------------------------------------------------------------------------------------------------------------------------------------------------------------------|
| <b>Morphology</b> | Area                     | cell/nucleus/cytoplasm/nucleolus/mitochondria                     | Area of the object ( <i>i.e.</i> number of pixels of the object scaled by pixel-area)                                                                                                                                                                                     |
|                   | convex area              | nucleus/cell                                                      | Area of the convex hull image, which is the smallest convex polygon that encloses the object                                                                                                                                                                              |
|                   | perimeter                | nucleus/cell                                                      | Perimeter of object which approximates the contour as a line through the centers of border pixels using a 4-connectivity                                                                                                                                                  |
|                   | perimeter Crofton        | nucleus/cell                                                      | Perimeter of object approximated by the Crofton formula in 4 directions                                                                                                                                                                                                   |
|                   | circularity              | nucleus/cell                                                      | Circularity defines how closely an object resembles a perfect circle                                                                                                                                                                                                      |
|                   | efc ratio                | nucleus                                                           | The EFC ratio measures the regularity of nuclei. A larger ratio indicates more circular or ellipsoidal shapes, while a smaller ratio suggests irregular and complex nuclear shape                                                                                         |
|                   | eccentricity             | nucleus/cell                                                      | Eccentricity of the ellipse having the same second moments as the object. The eccentricity is the ratio of the focal distance (distance between focal points) over the major axis length. The value is in the interval [0, 1). When it is 0, the ellipse becomes a circle |
|                   | equivalent diameter area | nucleus/cell                                                      | The diameter of a circle with the same area as the object                                                                                                                                                                                                                 |
|                   | Feret diameter max       | nucleus/cell                                                      | Maximum Feret's diameter computed as the longest distance between points around a region's convex hull contour                                                                                                                                                            |
|                   | Solidity                 | nucleus/cell                                                      | Ratio of pixels in the object to pixels of the convex hull image                                                                                                                                                                                                          |
| Extent            | nucleus/cell             | Ratio of pixels in the object to pixels in the total bounding box |                                                                                                                                                                                                                                                                           |
| <b>Intensity</b>  | Intensity percentile 10  | nucleus/cytoplasm/nucleolus/mitochondria                          | intensity value below which 10% of the pixel values in the image are found                                                                                                                                                                                                |
|                   | intensity percentile 25  | nucleus/cytoplasm/nucleolus/mitochondria                          | intensity value below which 25% of the pixel values in the image are found                                                                                                                                                                                                |
|                   | intensity percentile 75  | nucleus/cytoplasm/nucleolus/mitochondria                          | intensity value below which 75% of the pixel values in the image are found                                                                                                                                                                                                |
|                   | intensity percentile 90  | nucleus/cytoplasm/nucleolus/mitochondria                          | intensity value below which 90% of the pixel values in the image are found                                                                                                                                                                                                |
|                   | intensity median         | nucleus/cytoplasm/nucleolus/mitochondria                          | middle point of the pixel intensity distribution within the image                                                                                                                                                                                                         |
|                   | intensity mean           | nucleus/cytoplasm/nucleolus/mitochondria                          | average pixel intensity within the image                                                                                                                                                                                                                                  |

|                 |                                     |                                                                                                           |                                                                                                                    |
|-----------------|-------------------------------------|-----------------------------------------------------------------------------------------------------------|--------------------------------------------------------------------------------------------------------------------|
|                 | intensity median absolute deviation | nucleus/cytoplasm/nucleolus/mitochondria                                                                  | quantifies the spread or dispersion of pixel intensity values around the median intensity in the image             |
|                 | intensity std                       | nucleus/cytoplasm/nucleolus/mitochondria                                                                  | quantifies the amount of variation or dispersion of pixel intensity values within the image                        |
| <b>Textural</b> | contrast percentile 25              | nucleus/cytoplasm/nucleolus/mitochondria<br>cell mask vs<br>nucleus/cytoplasm/nucleolus/mitochondria imgs | measure of the local variations presents in the image. Specifically evaluates the lower 25% of contrast values     |
|                 | contrast percentile 50              | nucleus/cytoplasm/nucleolus/mitochondria<br>cell mask vs<br>nucleus/cytoplasm/nucleolus/mitochondria imgs | measure of the local variations presents in the image. Specifically evaluates the lower 50% of contrast values     |
|                 | contrast percentile 75              | nucleus/cytoplasm/nucleolus/mitochondria<br>cell mask vs<br>nucleus/cytoplasm/nucleolus/mitochondria imgs | measure of the local variations presents in the image. Specifically evaluates the lower 75% of contrast values     |
|                 | contrast mean                       | nucleus/cytoplasm/nucleolus/mitochondria<br>cell mask vs<br>nucleus/cytoplasm/nucleolus/mitochondria imgs | measures the typical magnitude of contrast values                                                                  |
|                 | contrast median absolute deviation  | nucleus/cytoplasm/nucleolus/mitochondria<br>cell mask vs<br>nucleus/cytoplasm/nucleolus/mitochondria imgs | midpoint of the contrast values in the image                                                                       |
|                 | contrast std                        | nucleus/cytoplasm/nucleolus/mitochondria<br>cell mask vs<br>nucleus/cytoplasm/nucleolus/mitochondria imgs | measures the variability or spread of contrast values                                                              |
|                 | dissimilarity percentile 25         | nucleus/cytoplasm/nucleolus/mitochondria<br>cell mask vs<br>nucleus/cytoplasm/nucleolus/mitochondria imgs | measures the degree of difference in pixel intensity. Specifically evaluates the lower 25% of dissimilarity values |
|                 | dissimilarity percentile 50         | nucleus/cytoplasm/nucleolus/mitochondria<br>cell mask vs<br>nucleus/cytoplasm/nucleolus/mitochondria imgs | measures the degree of difference in pixel intensity. Specifically evaluates the lower 50% of dissimilarity values |
|                 | dissimilarity percentile 75         | nucleus/cytoplasm/nucleolus/mitochondria<br>cell mask vs<br>nucleus/cytoplasm/nucleolus/mitochondria imgs | measures the degree of difference in pixel intensity. Specifically evaluates the lower 75% of dissimilarity values |
|                 | dissimilarity mean                  | nucleus/cytoplasm/nucleolus/mitochondria<br>cell mask vs<br>nucleus/cytoplasm/nucleolus/mitochondria imgs | measures the typical magnitude of dissimilarity values                                                             |

|                                         |                                                                                                           |                                                                                                                  |
|-----------------------------------------|-----------------------------------------------------------------------------------------------------------|------------------------------------------------------------------------------------------------------------------|
| dissimilarity median absolute deviation | nucleus/cytoplasm/nucleolus/mitochondria<br>cell mask vs<br>nucleus/cytoplasm/nucleolus/mitochondria imgs | midpoint of the dissimilarity values in the image                                                                |
| dissimilarity std                       | nucleus/cytoplasm/nucleolus/mitochondria<br>cell mask vs<br>nucleus/cytoplasm/nucleolus/mitochondria imgs | measures the variability or spread of dissimilarity values                                                       |
| homogeneity percentile 25               | nucleus/cytoplasm/nucleolus/mitochondria<br>cell mask vs<br>nucleus/cytoplasm/nucleolus/mitochondria imgs | measures the degree of similarity in pixel intensity. Specifically evaluates the lower 25% of homogeneity values |
| homogeneity percentile 50               | nucleus/cytoplasm/nucleolus/mitochondria<br>cell mask vs<br>nucleus/cytoplasm/nucleolus/mitochondria imgs | measures the degree of similarity in pixel intensity. Specifically evaluates the lower 50% of homogeneity values |
| homogeneity percentile 75               | nucleus/cytoplasm/nucleolus/mitochondria<br>cell mask vs<br>nucleus/cytoplasm/nucleolus/mitochondria imgs | measures the degree of similarity in pixel intensity. Specifically evaluates the lower 75% of homogeneity values |
| homogeneity mean                        | nucleus/cytoplasm/nucleolus/mitochondria<br>cell mask vs<br>nucleus/cytoplasm/nucleolus/mitochondria imgs | measures the typical magnitude of homogeneity values                                                             |
| homogeneity median absolute deviation   | nucleus/cytoplasm/nucleolus/mitochondria<br>cell mask vs<br>nucleus/cytoplasm/nucleolus/mitochondria imgs | midpoint of the homogeneity values in the image                                                                  |
| homogeneity std                         | nucleus/cytoplasm/nucleolus/mitochondria<br>cell mask vs<br>nucleus/cytoplasm/nucleolus/mitochondria imgs | measures the variability or spread of homogeneity values                                                         |
| energy percentile 25                    | nucleus/cytoplasm/nucleolus/mitochondria<br>cell mask vs<br>nucleus/cytoplasm/nucleolus/mitochondria imgs | measures the homogeneity or uniformity of pixel intensity. Specifically evaluates the lower 25% of energy values |
| energy percentile 50                    | nucleus/cytoplasm/nucleolus/mitochondria<br>cell mask vs<br>nucleus/cytoplasm/nucleolus/mitochondria imgs | measures the homogeneity or uniformity of pixel intensity. Specifically evaluates the lower 50% of energy values |
| energy percentile 75                    | nucleus/cytoplasm/nucleolus/mitochondria<br>cell mask vs<br>nucleus/cytoplasm/nucleolus/mitochondria imgs | measures the homogeneity or uniformity of pixel intensity. Specifically evaluates the lower 75% of energy values |

|                                       |                                                                                                           |                                                                                                                                                                |
|---------------------------------------|-----------------------------------------------------------------------------------------------------------|----------------------------------------------------------------------------------------------------------------------------------------------------------------|
| energy mean                           | nucleus/cytoplasm/nucleolus/mitochondria<br>cell mask vs<br>nucleus/cytoplasm/nucleolus/mitochondria imgs | measures the typical magnitude of energy values                                                                                                                |
| energy median absolute deviation      | nucleus/cytoplasm/nucleolus/mitochondria<br>cell mask vs<br>nucleus/cytoplasm/nucleolus/mitochondria imgs | midpoint of the energy values in the image                                                                                                                     |
| energy std                            | nucleus/cytoplasm/nucleolus/mitochondria<br>cell mask vs<br>nucleus/cytoplasm/nucleolus/mitochondria imgs | measures the variability or spread of energy values                                                                                                            |
| correlation percentile 25             | nucleus/cytoplasm/nucleolus/mitochondria<br>cell mask vs<br>nucleus/cytoplasm/nucleolus/mitochondria imgs | measures the degree of linear dependence between the pixel intensities in different regions of an image. Specifically evaluates the lower 25% of energy values |
| correlation percentile 50             | nucleus/cytoplasm/nucleolus/mitochondria<br>cell mask vs<br>nucleus/cytoplasm/nucleolus/mitochondria imgs | measures the degree of linear dependence between the pixel intensities in different regions of an image. Specifically evaluates the lower 50% of energy values |
| correlation percentile 75             | nucleus/cytoplasm/nucleolus/mitochondria<br>cell mask vs<br>nucleus/cytoplasm/nucleolus/mitochondria imgs | measures the degree of linear dependence between the pixel intensities in different regions of an image. Specifically evaluates the lower 75% of energy values |
| correlation mean                      | nucleus/cytoplasm/nucleolus/mitochondria<br>cell mask vs<br>nucleus/cytoplasm/nucleolus/mitochondria imgs | measures the typical magnitude of correlation values                                                                                                           |
| correlation median absolute deviation | nucleus/cytoplasm/nucleolus/mitochondria<br>cell mask vs<br>nucleus/cytoplasm/nucleolus/mitochondria imgs | midpoint of the correlation values in the image                                                                                                                |
| correlation std                       | nucleus/cytoplasm/nucleolus/mitochondria<br>cell mask vs<br>nucleus/cytoplasm/nucleolus/mitochondria imgs | measures the variability or spread of correlation values                                                                                                       |

**Table S2. Features included in the berberine chloride consensus fingerprint**

| Increased Features                        | EMD       | Decreased Features            | EMD       |
|-------------------------------------------|-----------|-------------------------------|-----------|
| Texture_W5-img-Cell-Mask_Homogeneity_25%  | 0.3170373 | Intensity_W5-img-Cell-Mask_90 | -0.352408 |
| Texture_W5-img-Cell-Mask_Homogeneity_mean | 0.3150326 | Intensity_W5-img-Cell-Mask_75 | -0.317043 |

|                                           |           |                                             |           |
|-------------------------------------------|-----------|---------------------------------------------|-----------|
| Texture_W5-img-Cell-Mask_Homogeneity_50%  | 0.3054184 | Texture_W5-img-Cell-Mask_Dissimilarity_75%  | -0.307451 |
| Texture_W5-img-Cell-Mask_Homogeneity_75%  | 0.2802248 | Texture_W5-img-Cell-Mask_Dissimilarity_mean | -0.300922 |
| Texture_W5-img-Cell-Mask_Energy_25%       | 0.2651592 | Intensity_W5-img-Cell-Mask_mean             | -0.294846 |
| Texture_W5-img-Cell-Mask_Energy_mean      | 0.2588387 | Texture_W5-img-Cell-Mask_Dissimilarity_std  | -0.294113 |
| Texture_W5-img-Cell-Mask_Energy_75%       | 0.2497095 | Texture_W5-img-Cell-Mask_Dissimilarity_mad  | -0.290659 |
| Texture_W5-img-Cell-Mask_Energy_50%       | 0.2471353 | Texture_W5-img-Cell-Mask_Homogeneity_std    | -0.282357 |
| Texture_W5-img-Mito-Mask_Homogeneity_25%  | 0.1851009 | Texture_W5-img-Cell-Mask_Dissimilarity_50%  | -0.276137 |
| Texture_W5-img-Mito-Mask_Homogeneity_mean | 0.1845715 | Intensity_W5-img-Cell-Mask_median           | -0.273289 |
| Texture_W5-img-Mito-Mask_Homogeneity_50%  | 0.183436  | Intensity_W5-img-Cell-Mask_mad              | -0.267722 |
| Texture_W5-img-Mito-Mask_Homogeneity_75%  | 0.1631843 | Texture_W5-img-Cell-Mask_Contrast_mad       | -0.265866 |
|                                           |           | Texture_W5-img-Cell-Mask_Homogeneity_mad    | -0.264881 |
|                                           |           | Texture_W5-img-Cell-Mask_Contrast_std       | -0.264421 |
|                                           |           | Intensity_W5-img-Mito-Mask_25               | -0.263909 |
|                                           |           | Intensity_W5-img-Mito-Mask_median           | -0.254738 |
|                                           |           | Intensity_W5-img-Mito-Mask_10               | -0.251353 |
|                                           |           | Texture_W5-img-Cell-Mask_Dissimilarity_25%  | -0.251204 |
|                                           |           | Texture_W5-img-Cell-Mask_Contrast_75%       | -0.249717 |
|                                           |           | Intensity_W5-img-Cell-Mask_25               | -0.237687 |
|                                           |           | Texture_W5-img-Cell-Mask_Contrast_mean      | -0.237471 |
|                                           |           | Intensity_W5-img-Mito-Mask_mean             | -0.215042 |
|                                           |           | Intensity_W5-img-Mito-Mask_75               | -0.212328 |
|                                           |           | Texture_W5-img-Cell-Mask_Contrast_50%       | -0.210001 |
|                                           |           | Texture_W5-img-Mito-Mask_Dissimilarity_75%  | -0.198229 |
|                                           |           | Intensity_W5-img-Cell-Mask_std              | -0.194447 |
|                                           |           | Misc_Area-Ratio_mito/cyto                   | -0.191162 |
|                                           |           | Texture_W5-img-Mito-Mask_Contrast_75%       | -0.187751 |
|                                           |           | Texture_W5-img-Mito-Mask_Dissimilarity_mean | -0.186542 |
|                                           |           | Texture_W5-img-Mito-Mask_Dissimilarity_std  | -0.178639 |
|                                           |           | Texture_W5-img-Mito-Mask_Dissimilarity_mad  | -0.177346 |
|                                           |           | Texture_W5-img-Cell-Mask_Contrast_25%       | -0.177221 |
|                                           |           | Texture_W5-img-Mito-Mask_Contrast_mad       | -0.175783 |

|  |  |                                            |           |
|--|--|--------------------------------------------|-----------|
|  |  | Texture_W5-img-Mito-Mask_Contrast_mean     | -0.174393 |
|  |  | Texture_W5-img-Mito-Mask_Dissimilarity_50% | -0.171673 |
|  |  | Texture_W5-img-Mito-Mask_Contrast_std      | -0.171529 |
|  |  | Misc_Area-Ratio_mito/cell                  | -0.167266 |
|  |  | Texture_W5-img-Mito-Mask_Correlation_75%   | -0.158939 |
|  |  | Texture_W5-img-Mito-Mask_Dissimilarity_25% | -0.158591 |
|  |  | Intensity_W5-img-Cell-Mask_10              | -0.157554 |
|  |  | Texture_W5-img-Mito-Mask_Contrast_50%      | -0.155514 |
|  |  | Texture_W5-img-Mito-Mask_Homogeneity_std   | -0.153602 |

## SUPPLEMENTARY FIGURES

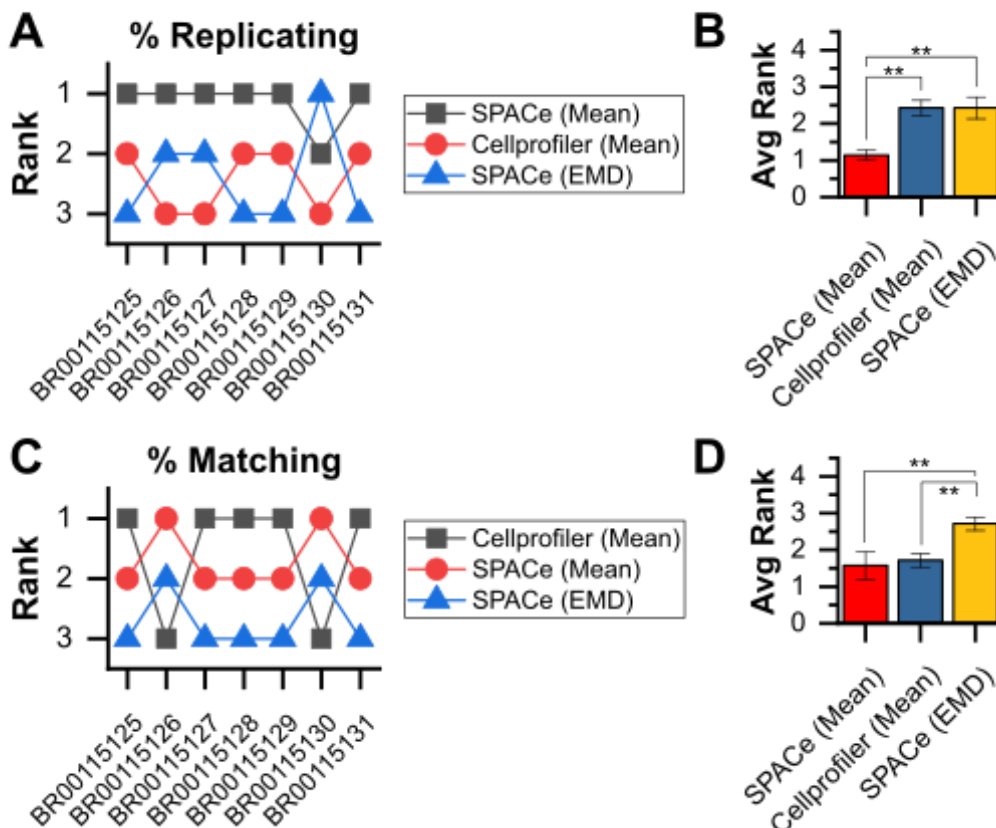

**Figure S1.** Rank performance of CellProfiler and SPACe analysis of JUMP MoA reference datasets. A) Rank order of percent replicating (“similarity between wells of the same treatment”) performance of CellProfiler and SPACe features across JUMP MoA reference datasets. B) Bar chart and statistical analysis of percent

replicating performance. C) Rank order of percent matching (“similarity between treatments with same MoA”) performance of CellProfiler and SPACe features across JUMP MoA reference datasets. D) Bar chart and statistical analysis of percent matching performance. Brackets and (\*\*) indicates a p-value < 0.01.

Source data are provided in the Source Data file.

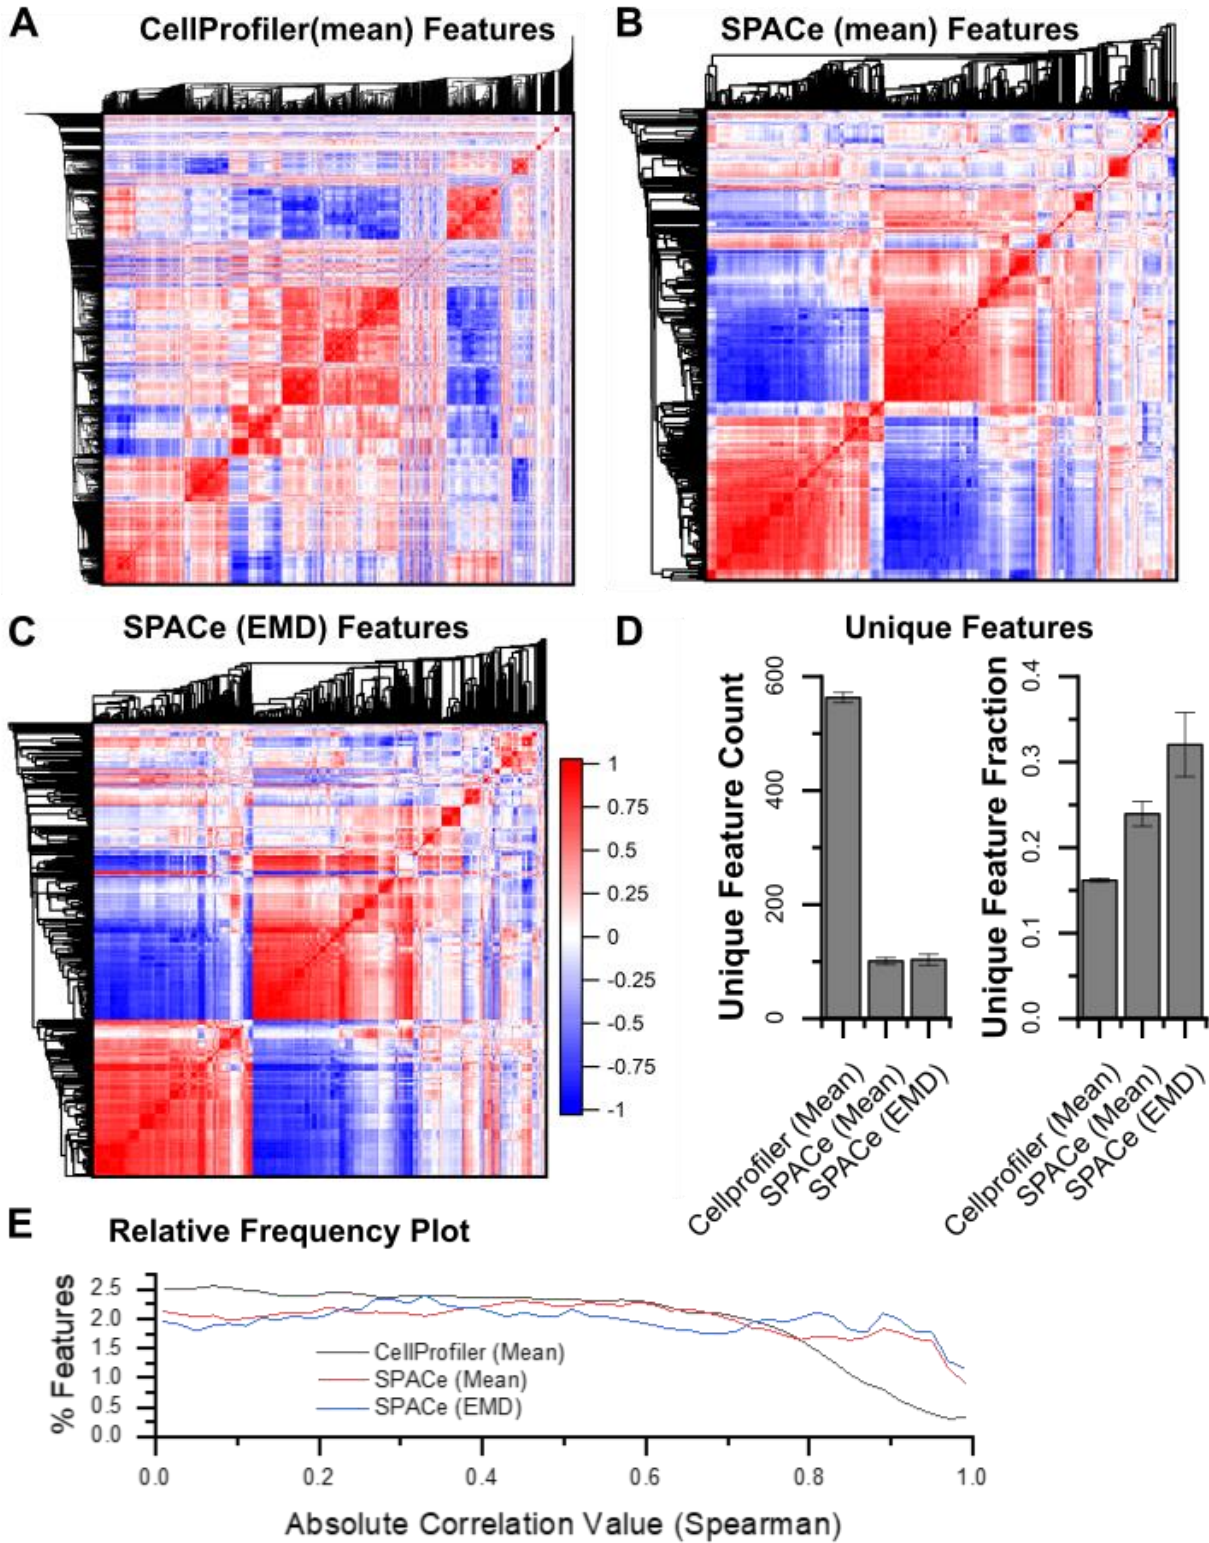

**Figure S2.** Correlation analysis of extracted features in the JUMP MoA reference datasets. Median correlation (Spearman) matrix across seven JUMP MoA reference datasets for feature extracted using (A) CellProfiler or SPACe (B, mean; C, EMD). Features are clustered using a Euclidian distance nearest neighbor algorithm. D) Absolute count (left) and fraction (right) of unique features for CellProfiler and SPACe analysis. E) Relative frequency plot of absolute Spearman correlation values between features produced by CellProfiler and SPACe. Source data are provided as a Source Data file.



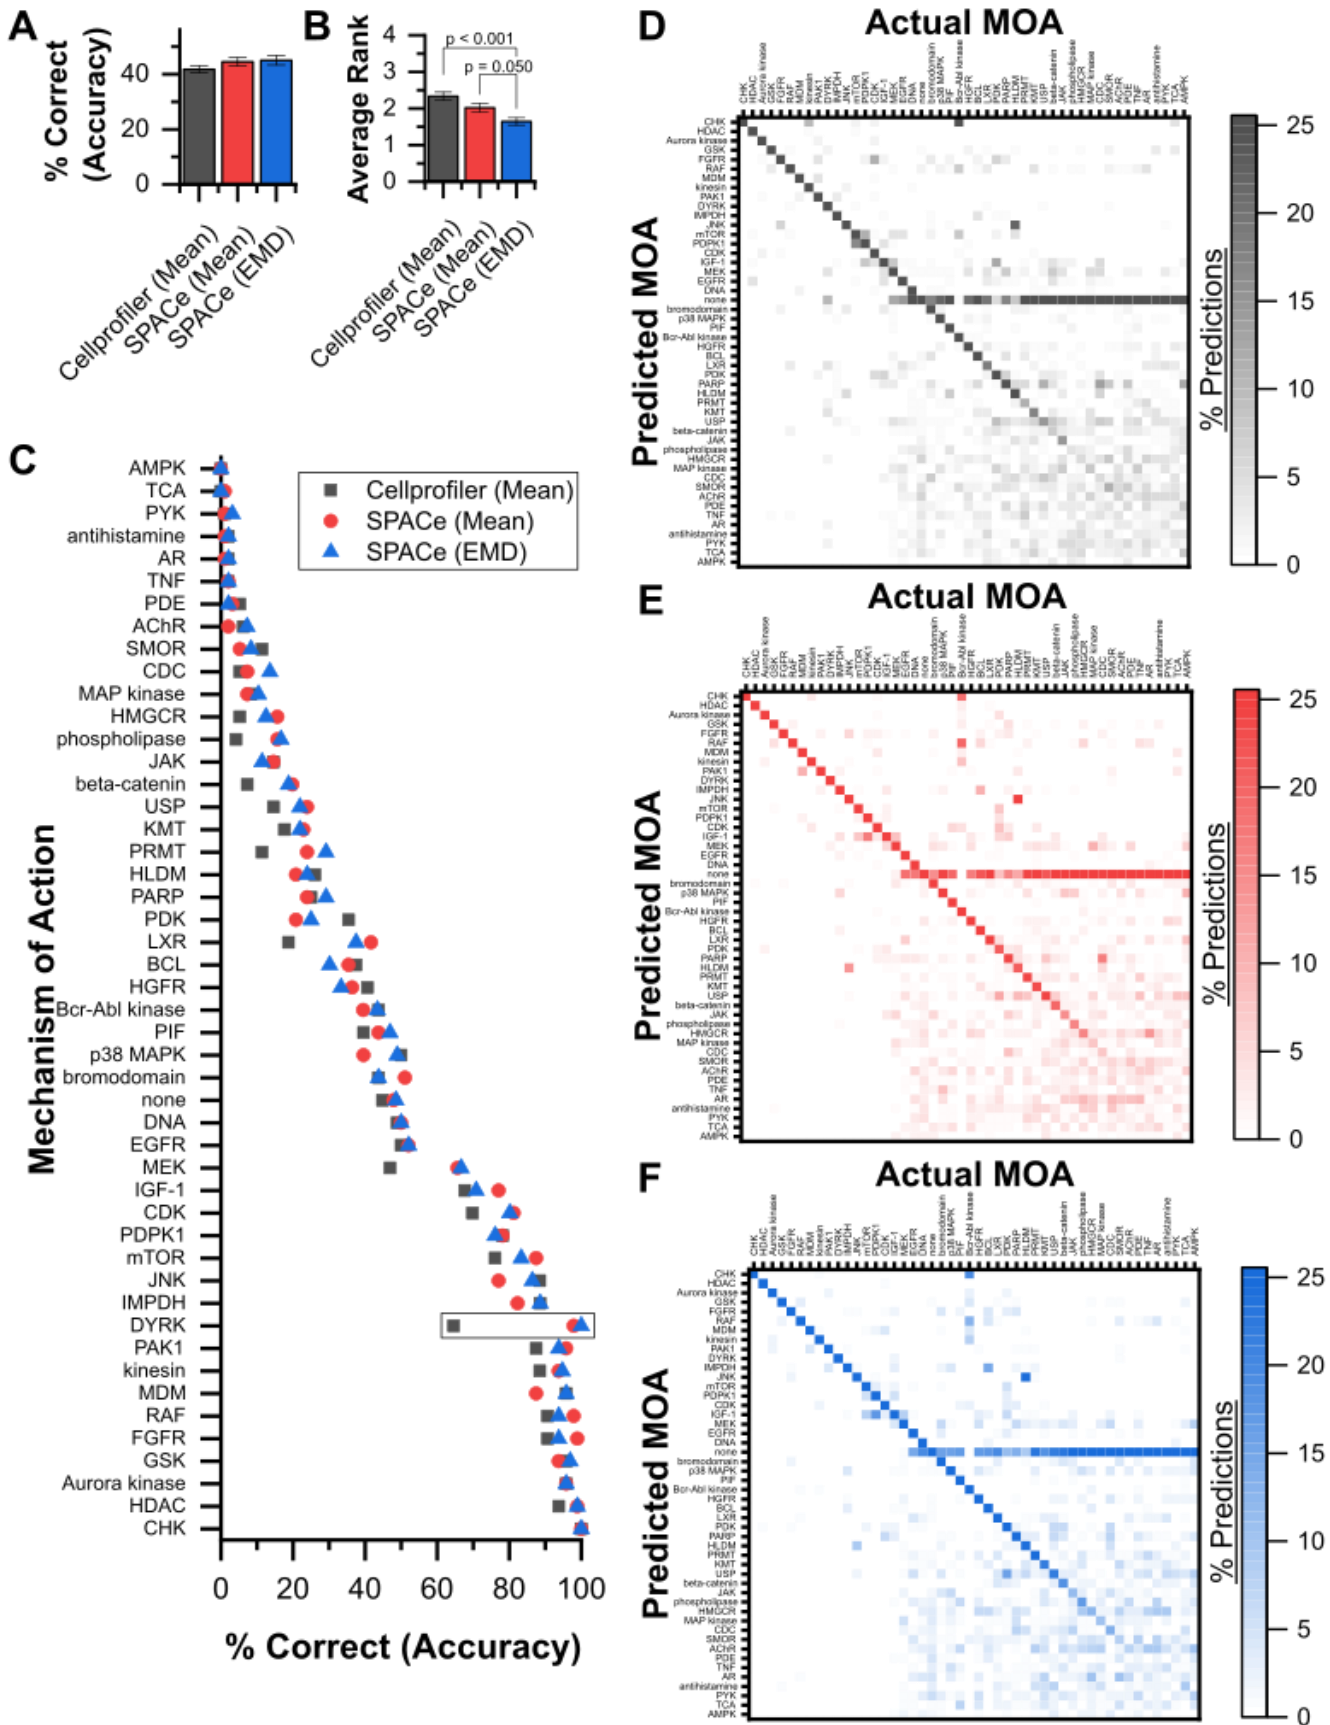

**Figure S3.** Machine learning model prediction performance using CellProfiler or SPACe extracted features. For six JUMP MoA reference datasets, a set of 5 Random Forest (RF) models were generated to predict MoA

using either CellProfiler (Mean), SPACe (Mean), or SPACe (EMD) values. A) Mean and standard deviation of overall accuracy for RF models. B) Rank analysis showing the mean and standard deviation of model rank (1 – best, 3 – worst) based on the average prediction accuracy for each MOA of RF models trained using either CellProfiler (Mean), SPACe (Mean), or SPACe (EMD) values. Brackets and p-values indicate significant differences observed. C) Average RF model % correct (accuracy) predictions for each MOA contained in the JUMP reference datasets. D-F) Confusion matrices showing the average classification performance of models trained and tested using CellProfiler (Mean), SPACe (Mean), and SPACe (EMD) data, respectively. X and Y axis are ordered based on the order found in (C). Source data are provided as a Source Data file.

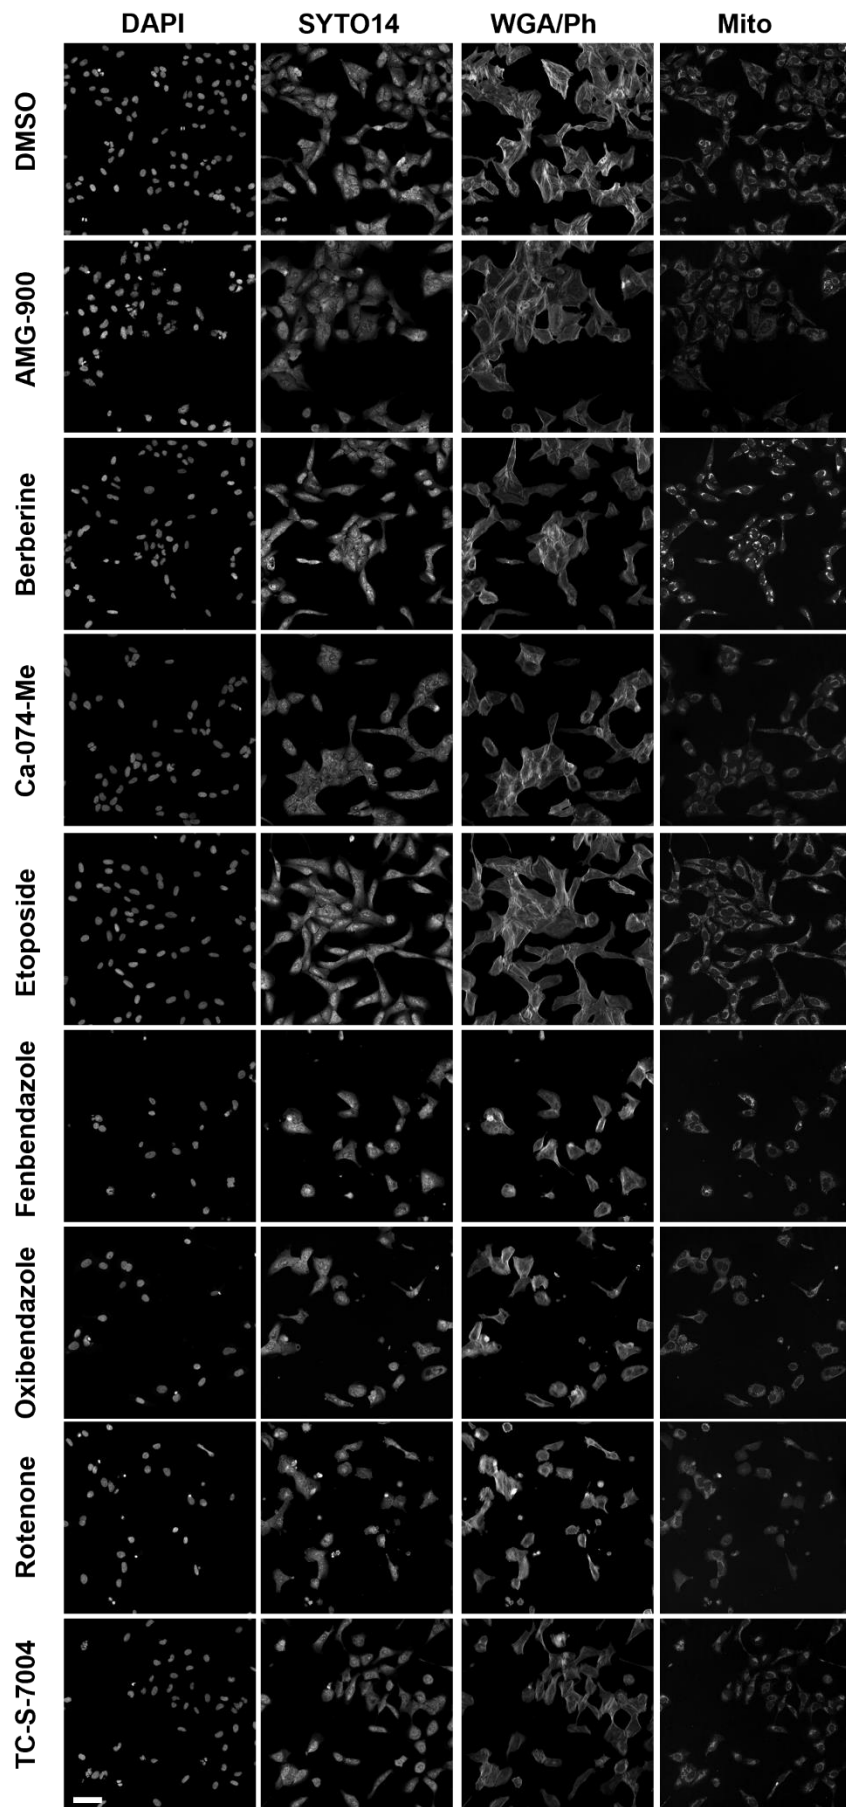

**Figure S4.** Greyscale images of the treatments described in Figure 2 representing the DAPI, SYTO14, WGA/phalloidin and MitoTracker channels. Scale bar: 50  $\mu\text{m}$ .

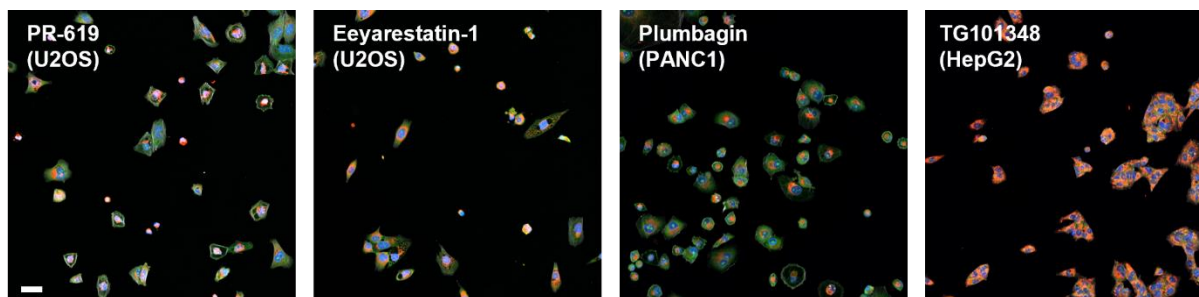

**Figure S5.** Representative images of the indicated treatments that showed unique phenotypes but also some toxicity in the various cell lines. Scale bar: 20  $\mu\text{m}$ .
